# Supplementary material
Source: ML conference proceedings conference paper supplement (https://proceedings.neurips.cc/paper_files/paper/2022/hash/89b0e466b46292ce0bfe53618aadd3de-Abstract.html)
Supplement: Supplementary file 1 [file 89b0e466b46292ce0bfe53618aadd3de-Supplemental-Conference.pdf]

---

# Appendix for “Respecting Transfer Gap in Knowledge Distillation”

---

Yulei Niu<sup>1</sup> Long Chen<sup>1</sup> Chang Zhou<sup>2</sup> Hanwang Zhang<sup>3</sup>

<sup>1</sup>Columbia University <sup>2</sup>Damo Academy, Alibaba Group <sup>3</sup>Nanyang Technological University  
{yn.yuleiniu, zjuochenlong}@gmail.com zhouchang.zc@alibaba-inc.com  
hanwangzhang@ntu.edu.sg

## Appendix

### 1 Experimental Settings

#### 1.1 Two-stage Distillation

**Implementation.** We follow the training details of Tian *et al.* [18] for CIFAR-100 and Zhou *et al.* [23] for ImageNet. Specifically, for CIFAR-100, we set the mini-batch size as 64 and an initial learning rate as 0.05. We train the model for 240 epochs. The learning rate is decayed by 10 every 30 epochs after 150 epochs. We initialize the learning rate as 0.01 for MobileNetV2, ShuffleNetV1 and ShuffleNetV2, and as 0.05 for other models. The experiments are conducted using one NVIDIA TITAN RTX GPU. For ImageNet, we train the model for 100 epochs. We set the mini-batch size as 256, an initial learning rate as 0.1, and decay it by 10 every 30 epochs. The experiments are conducted using four Tesla V100 GPUs.

**Architectures.** We follow Tian *et al.* [18] for the choice of network architectures. Specifically, “WRN-d-w” denotes Wide Residual Network (WRN) [21] with depth  $d$  and width factor  $w$ . “resnet-d” represents cifar-style ResNet [3] with 3 groups of basic blocks, each with 16, 32, and 64 channels respectively. For example, resnet8x4 and resnet32x4 represent a 4 times wider network, *i.e.*, with 64, 128, and 256 channels respectively. “ResNet-d” represents the ImageNet-style ResNet with Bottleneck blocks and more channels. MobileNetV2 [16] has a width multiplier of 0.5. “vgg” denotes VGGNet [17] that is adapted from its original ImageNet counterpart. “ShuffleNetV1” [22], “ShuffleNetV2” [10] are adapted with input size as 32x32.

#### 1.2 One-stage Self-Distillation

**Implementation.** We follow all the training details of PS-KD [9]. The standard data augmentation schemes are 32x32 random crop after padding with 4 pixels and random horizontal flip. The networks are trained for 300 epochs using SGD with a momentum of 0.9. The learning rate is decayed by 10 at 150 and 225 epochs. We set the mini-batch size as 128, an initial learning rate as 0.1, and a weight decay as 0.0005. The experiments are conducted using four Tesla V100 GPUs.

**Metrics.** Besides top-1 and top-5 accuracies, we follow Kim *et al.* [9] and report Expected calibration error (ECE) and Area under risk-coverage curve (AURC) for evaluation. Expected calibration error (ECE) [11] is used to evaluate the confidence calibration performance of models, *i.e.*, the expected gap between accuracy and confidence. Specifically, the samples are partitioned by confidence into  $M$  bins  $B_1, \dots, B_M$ . The  $m$ -th bin  $B_m$  contains samples with confidence within  $[\frac{m-1}{M}, \frac{m}{M}]$ . For  $N$  samples, ECE is formulated as:

$$\text{ECE} = \frac{1}{N} \sum_{m=1}^M |B_m| \times |\text{Acc}(B_m) - \text{Conf}(B_m)|,$$

Table 1: Top-1 accuracy of student networks on CIFAR-100 test set for the two-stage distillation setting. \* denotes our reproduced results using the same teacher model.

| Teacher<br>Student | Same architecture style |                       | Different architecture style |                      |
|--------------------|-------------------------|-----------------------|------------------------------|----------------------|
|                    | WRN-40-2<br>WRN-16-2    | resnet110<br>resnet20 | resnet32x4<br>ShuffleNetV2   | vgg13<br>MobileNetV2 |
| Teacher            | 75.61                   | 74.31                 | 79.42                        | 74.64                |
| Student            | 73.26                   | 69.06                 | 71.82                        | 64.60                |
| FitNet [15]        | 73.58                   | 68.99                 | 73.54                        | 64.14                |
| AT [20]            | 74.08                   | 70.22                 | 72.73                        | 59.40                |
| SP [19]            | 73.83                   | 70.04                 | 74.56                        | 66.30                |
| CC [14]            | 73.56                   | 69.48                 | 71.29                        | 64.86                |
| VID [1]            | 74.11                   | 70.16                 | 73.40                        | 65.56                |
| RKD [12]           | 73.35                   | 69.25                 | 73.21                        | 64.52                |
| PKT [13]           | 74.54                   | 70.25                 | 74.69                        | 67.13                |
| AB [4]             | 72.50                   | 69.53                 | 74.31                        | 66.06                |
| FT [8]             | 73.25                   | 70.22                 | 72.50                        | 61.78                |
| NST [6]            | 73.68                   | 69.53                 | 74.68                        | 58.16                |
| KD [5]             | 74.92                   | 70.67                 | 74.45                        | 67.37                |
| CRD [18]           | 75.48                   | <b>71.46</b>          | 75.65                        | 69.73                |
| WSLD* [23]         | 75.63                   | 71.20                 | 75.55                        | 68.50                |
| <b>IPWD</b>        | <b>75.83</b>            | 71.22                 | <b>76.61</b>                 | <b>69.81</b>         |

where  $\text{Acc}(B_m)$  denotes the accuracy of samples in  $B_m$ , and  $\text{Conf}(B_m)$  denotes the average confidence of samples in  $B_m$ . A lower BCE indicates a well-calibrated model.

Area under risk-coverage curve (AURC) [2] measures how well predictions are ordered by confidence values. Specifically, we can determine a threshold for classification, where only samples with confidence higher than the threshold are accepted. After that, we can obtain the proportion of covered samples to the whole dataset, *i.e.*, coverage, and define the risk as the error rate computed by using the covered samples. AURC is defined as the area under the risk-coverage curve. A lower AURC indicates that the correct and incorrect predictions are well-separable by confidence values.

### 1.3 License of Assets

We reimplemented WSLD<sup>1</sup> and SSKD<sup>2</sup> based on their open-sourced codes. Both WSLD and SSKD did not mention the license in their open-sourced codes.

## 2 Additional Results

### 2.1 Architecture styles

Due to page limitation, we did not include all the results of different architecture styles on CIFAR-100 in the main paper. We provide additional results in Table 1. Results show that our IPWD achieves competitive performances and outperforms KD by large margins.

### 2.2 Feature-based Methods

Note that our proposed IPWD is a logit-based distillation method. An interesting question is whether the reweighting strategy can work with feature-based distillation methods. We select ReviewKD as an example, which is a recent representative feature-based distillation method. As shown in Figure 2, the gap between ReviewKD+IPWD and ReviewKD is very marginal, which indicates that IPWD cannot promote feature-based distillation. The possible reasons are two-fold. First, the logit knowledge of label  $y$  is long-tailed but the representation knowledge of sample  $x$  may be relatively balanced. Second, as pointed out by Kang *et al.* [7], “data imbalance might not be an issue in learning

<sup>1</sup><https://github.com/bellymonster/Weighted-Soft-Label-Distillation>

<sup>2</sup><https://github.com/xuguodong03/SSKD>

Table 2: ReviewKD with our IPWD reweighting strategy on feature level.

| Teacher         | WRN-40-2     | resnet56     | resnet110    | resnet32x4   | WRN-40-2     |
|-----------------|--------------|--------------|--------------|--------------|--------------|
| Student         | WRN-16-2     | resnet20     | resnet32     | ShuffleV2    | ShuffleV1    |
| ReviewKD        | 76.12        | <b>71.89</b> | <b>73.89</b> | <b>77.78</b> | <b>77.14</b> |
| ReviewKD + IPWD | <b>76.25</b> | 71.51        | 73.79        | 77.74        | 77.06        |

Table 3: Ablation study of CE-aware output on CIFAR-100. \* denotes that the CE-aware output is obtained from an extra student model.

| Teacher     | resnet110 | resnet32x4 | resnet32x4 | resnet32x4 |
|-------------|-----------|------------|------------|------------|
| Student     | resnet32  | resnet8x4  | ShuffleV1  | ShuffleV2  |
| Teacher     | 74.31     | 79.42      | 79.42      | 79.42      |
| Student     | 71.14     | 72.50      | 70.50      | 71.82      |
| IPWD*       | 73.64     | 75.88      | 75.98      | 76.83      |
| <b>IPWD</b> | 73.91     | 76.03      | 76.03      | 76.61      |

high-quality representations” for long-tailed classification, which implies that the reweighting strategy is not compatible at feature level.

### 2.3 Long-tailed Methods for KD

Following LA, we applied the class prior to the student output when calculating the KL divergence distillation loss. We found that KD+LA underperforms KD by averagely 0.5% on CIFAR-100. The possible reason is that the introduced prior indirectly breaks the teacher’s knowledge for each training sample, which hurts the effectiveness of distillation. These results indicate that logit-adjust-based long-tailed techniques are not applicable to the issue of KD.

### 2.4 Ablation Studies

We have conducted ablation studies on the components of our proposed IPWD. In the appendix, we further provide ablation studies on the technical designs.

We take two-stage distillation on CIFAR-100 as an example. Recall that the sample weights are estimated based on the two types of student’s outputs, KD-trained output  $y^{kd}$  from the student’s original head and CLS-trained output  $y^{cls}$  from the student’s extra head. We further conduct ablations on the selection of two outputs.

For CE-aware output  $y^{cls}$ , a straightforward alternative is using an extra model that has the same architecture as student with totally different parameters. This extra model is trained using the cross-entropy classification loss. In other words, the difference is whether the visual backbone is shared for the two outputs. We denote this alternative as IPWD\*. Table 3 shows the comparison. Overall, IPWD\* achieves competitive results compared to IPWD. However, training an extra model leads to more memory and time cost. Therefore, our design that takes an extra head is both effective and efficient.

For KD-trained output  $y^{kd}$ , a straightforward alternative is using an extra distillation head like the classification head. Different from the original head of the student, the distillation head is trained only using the distillation loss, which simply mimics the teacher’s output without ground-truth annotations. We denote this alternative as IPWD<sup>†</sup>. Table 4 shows the comparison. Overall, IPWD<sup>†</sup> slightly underperforms IPWD with different four architectures. The reason is that the extra distillation head only learns from the teacher model, which is sensitive to the teacher’s performance and weights hard samples more. These two ablation studies further verify the effectiveness of our technical designs.

Table 4: Ablation study of KD-aware output on CIFAR-100. † denotes that the KD-aware output is obtained from another extra head trained only with the original distillation loss.

| Teacher           | resnet110 | resnet32x4 | resnet32x4 | resnet32x4 |
|-------------------|-----------|------------|------------|------------|
| Student           | resnet32  | resnet8x4  | ShuffleV1  | ShuffleV2  |
| Teacher           | 74.31     | 79.42      | 79.42      | 79.42      |
| Student           | 71.14     | 72.50      | 70.50      | 71.82      |
| IPWD <sup>†</sup> | 73.56     | 75.88      | 75.93      | 76.44      |
| <b>IPWD</b>       | 73.91     | 76.03      | 76.03      | 76.61      |

## References

- [1] Sungsoo Ahn, Shell Xu Hu, Andreas Damianou, Neil D Lawrence, and Zhenwen Dai. Variational information distillation for knowledge transfer. In *Proceedings of the IEEE/CVF Conference on Computer Vision and Pattern Recognition*, pages 9163–9171, 2019.
- [2] Yonatan Geifman, Guy Uziel, and Ran El-Yaniv. Bias-reduced uncertainty estimation for deep neural classifiers. *arXiv preprint arXiv:1805.08206*, 2018.
- [3] Kaiming He, Xiangyu Zhang, Shaoqing Ren, and Jian Sun. Deep residual learning for image recognition. In *Proceedings of the IEEE conference on computer vision and pattern recognition*, pages 770–778, 2016.
- [4] Byeongho Heo, Minsik Lee, Sangdoon Yun, and Jin Young Choi. Knowledge transfer via distillation of activation boundaries formed by hidden neurons. In *Proceedings of the AAAI Conference on Artificial Intelligence*, volume 33, pages 3779–3787, 2019.
- [5] Geoffrey Hinton, Oriol Vinyals, and Jeff Dean. Distilling the knowledge in a neural network. *arXiv preprint arXiv:1503.02531*, 2015.
- [6] Zehao Huang and Naiyan Wang. Like what you like: Knowledge distill via neuron selectivity transfer. *arXiv preprint arXiv:1707.01219*, 2017.
- [7] Bingyi Kang, Saining Xie, Marcus Rohrbach, Zhicheng Yan, Albert Gordo, Jiashi Feng, and Yannis Kalantidis. Decoupling representation and classifier for long-tailed recognition. In *International Conference on Learning Representations*, 2019.
- [8] Jangho Kim, SeongUk Park, and Nojun Kwak. Paraphrasing complex network: network compression via factor transfer. In *Proceedings of the 32nd International Conference on Neural Information Processing Systems*, pages 2765–2774, 2018.
- [9] Kyungyul Kim, ByeongMoon Ji, Doyoung Yoon, and Sangheum Hwang. Self-knowledge distillation with progressive refinement of targets. In *Proceedings of the IEEE/CVF International Conference on Computer Vision*, pages 6567–6576, 2021.
- [10] Ningning Ma, Xiangyu Zhang, Hai-Tao Zheng, and Jian Sun. Shufflenet v2: Practical guidelines for efficient cnn architecture design. In *Proceedings of the European conference on computer vision (ECCV)*, pages 116–131, 2018.
- [11] Mahdi Pakdaman Naeini, Gregory Cooper, and Milos Hauskrecht. Obtaining well calibrated probabilities using bayesian binning. In *Twenty-Ninth AAAI Conference on Artificial Intelligence*, 2015.
- [12] Wonpyo Park, Dongju Kim, Yan Lu, and Minsu Cho. Relational knowledge distillation. In *Proceedings of the IEEE/CVF Conference on Computer Vision and Pattern Recognition*, pages 3967–3976, 2019.
- [13] Nikolaos Passalis and Anastasios Tefas. Learning deep representations with probabilistic knowledge transfer. In *Proceedings of the European Conference on Computer Vision (ECCV)*, pages 268–284, 2018.

- [14] Baoyun Peng, Xiao Jin, Jiaheng Liu, Dongsheng Li, Yichao Wu, Yu Liu, Shunfeng Zhou, and Zhaoning Zhang. Correlation congruence for knowledge distillation. In *Proceedings of the IEEE/CVF International Conference on Computer Vision*, pages 5007–5016, 2019.
- [15] Adriana Romero, Nicolas Ballas, Samira Ebrahimi Kahou, Antoine Chassang, Carlo Gatta, and Yoshua Bengio. Fitnets: Hints for thin deep nets. *arXiv preprint arXiv:1412.6550*, 2014.
- [16] Mark Sandler, Andrew Howard, Menglong Zhu, Andrey Zhmoginov, and Liang-Chieh Chen. Mobilenetv2: Inverted residuals and linear bottlenecks. In *Proceedings of the IEEE conference on computer vision and pattern recognition*, pages 4510–4520, 2018.
- [17] Karen Simonyan and Andrew Zisserman. Very deep convolutional networks for large-scale image recognition. *arXiv preprint arXiv:1409.1556*, 2014.
- [18] Yonglong Tian, Dilip Krishnan, and Phillip Isola. Contrastive representation distillation. *arXiv preprint arXiv:1910.10699*, 2019.
- [19] Frederick Tung and Greg Mori. Similarity-preserving knowledge distillation. In *Proceedings of the IEEE/CVF International Conference on Computer Vision*, pages 1365–1374, 2019.
- [20] Sergey Zagoruyko and Nikos Komodakis. Paying more attention to attention: Improving the performance of convolutional neural networks via attention transfer. *arXiv preprint arXiv:1612.03928*, 2016.
- [21] Sergey Zagoruyko and Nikos Komodakis. Wide residual networks. *arXiv preprint arXiv:1605.07146*, 2016.
- [22] Xiangyu Zhang, Xinyu Zhou, Mengxiao Lin, and Jian Sun. Shufflenet: An extremely efficient convolutional neural network for mobile devices. In *Proceedings of the IEEE conference on computer vision and pattern recognition*, pages 6848–6856, 2018.
- [23] Helong Zhou, Liangchen Song, Jiajie Chen, Ye Zhou, Guoli Wang, Junsong Yuan, and Qian Zhang. Rethinking soft labels for knowledge distillation: A bias-variance tradeoff perspective. *arXiv preprint arXiv:2102.00650*, 2021.
